# Supplementary material for: Structure of UBE2K–Ub/E3/polyUb reveals mechanisms of K48-linked Ub chain extension
Source: PubMed Central journal article supplement (PMC8964413; doi:10.1038/s41589-021-00952-x), 2022-01-13
Supplement: 41589_2021_952_MOESM1_ESM.pdf [file 41589_2021_952_MOESM1_ESM.pdf]

---

**Supplementary information**

---

**Structure of UBE2K–Ub/E3/polyUb reveals mechanisms of K48-linked Ub chain extension**

---

In the format provided by the authors and unedited

## **Supplemental Information**

### **Structure of UBE2K–Ub/E3/polyUb reveals mechanisms of K48-linked Ub chain extension**

Mark A. Nakasone, Karolina A. Majorek, Mads Gabrielsen, Gary J. Sibbet, Brian O. Smith, and Danny T. Huang

**a**

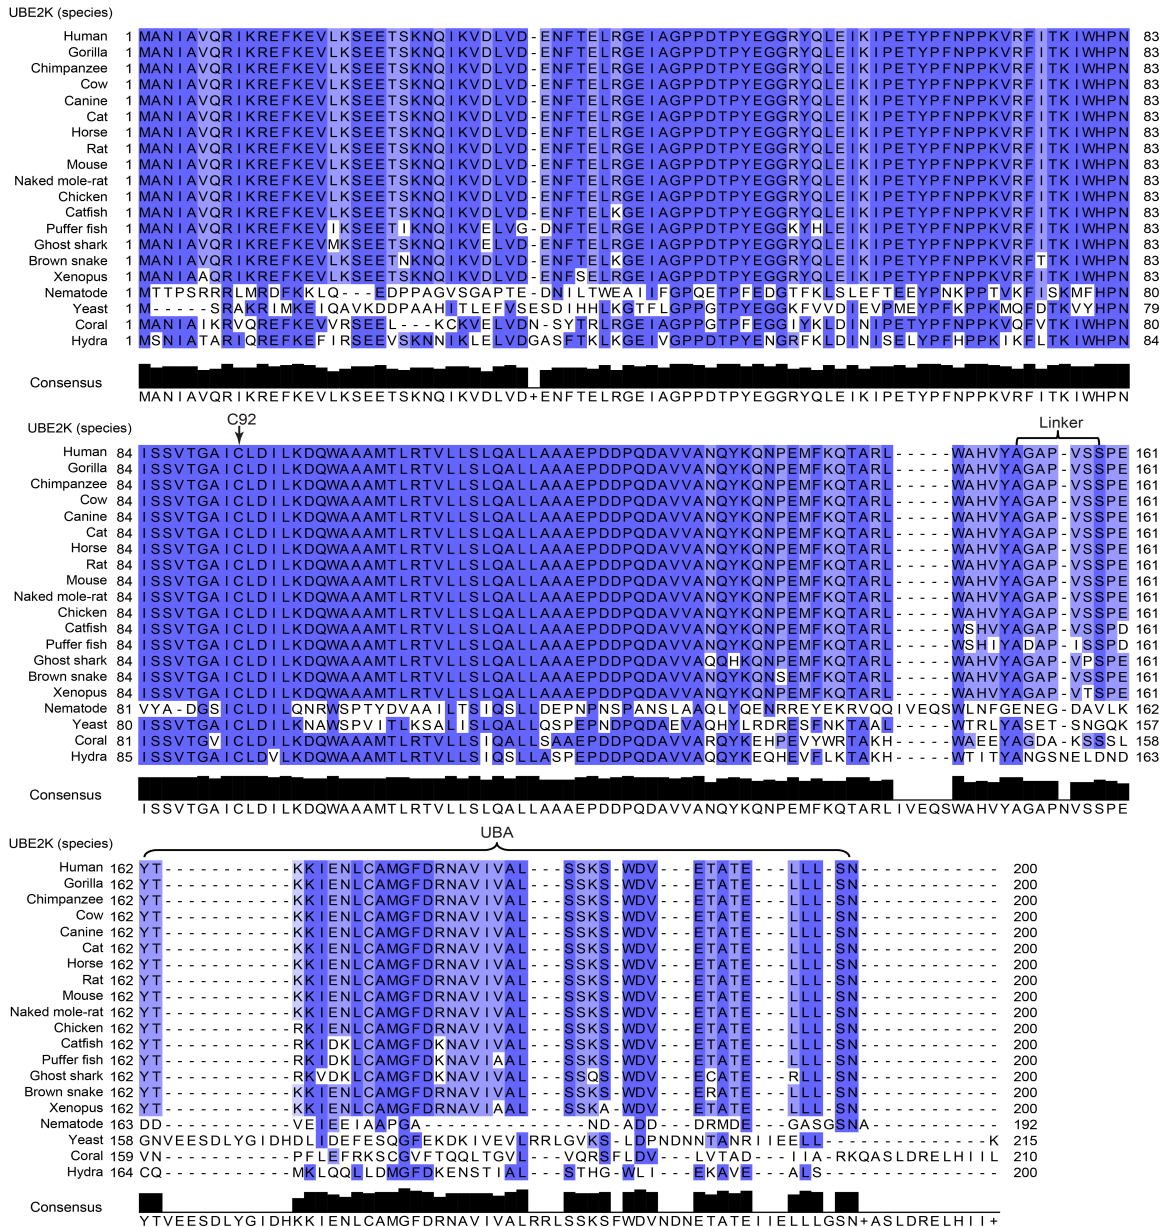

**b**

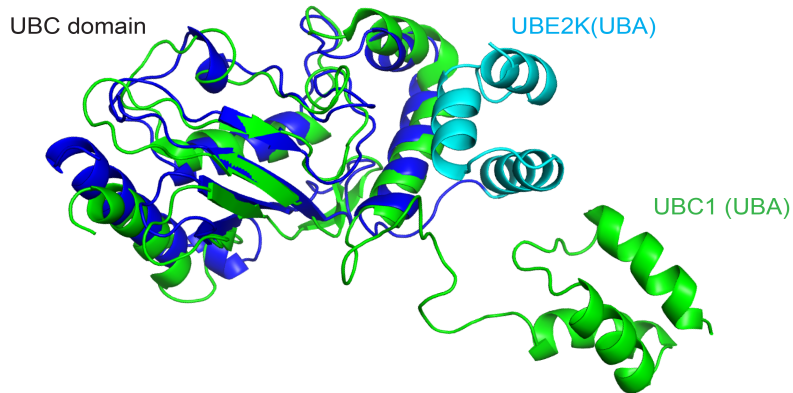

**Supplementary Figure 1. Domain structure of UBE2K.** (a) Sequence alignment of UBE2K across species with consensus (black bars). (b) Structural superposition of human UBE2K (PDB 1YLA; UBC in cyan and UBA in blue) with yeast homologue Ubc1 (PDB 1TTE; green).

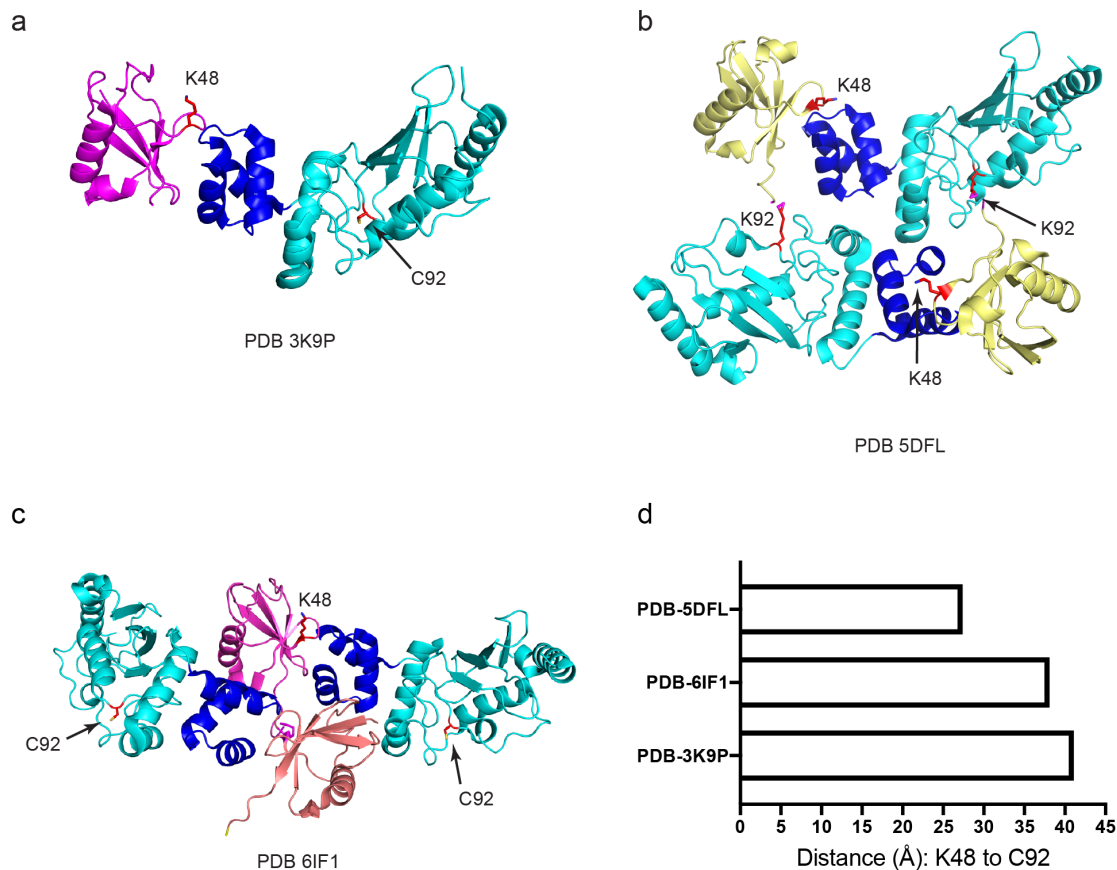

**Supplementary Figure 2. Published structures of UBE2K and Ub complexes.** (a) Structure of UBE2K (cyan) bound to mono-Ub (magenta) on the M172/L198 binding site (PDB-3K9P). (b) Structure of UBE2K<sup>C92K</sup> (cyan) loaded with Ub<sup>D</sup> (yellow), where Ub binds the M172/L198 site *in trans* (PDB-5DFL). (c) Structure of a non-covalent complex of UBE2K and K48-Ub<sub>2</sub> where the distal (magenta) and proximal (salmon) units in K48-Ub<sub>2</sub> bind separate UBE2K molecules on the M172/L198 site (PDB-6IF1). UBE2K catalytic C92 and Ub K48 are indicated. (d) The shortest distance between Cβ in residue 92 of UBE2K and Cβ of K48 in Ub is plotted for each structure.

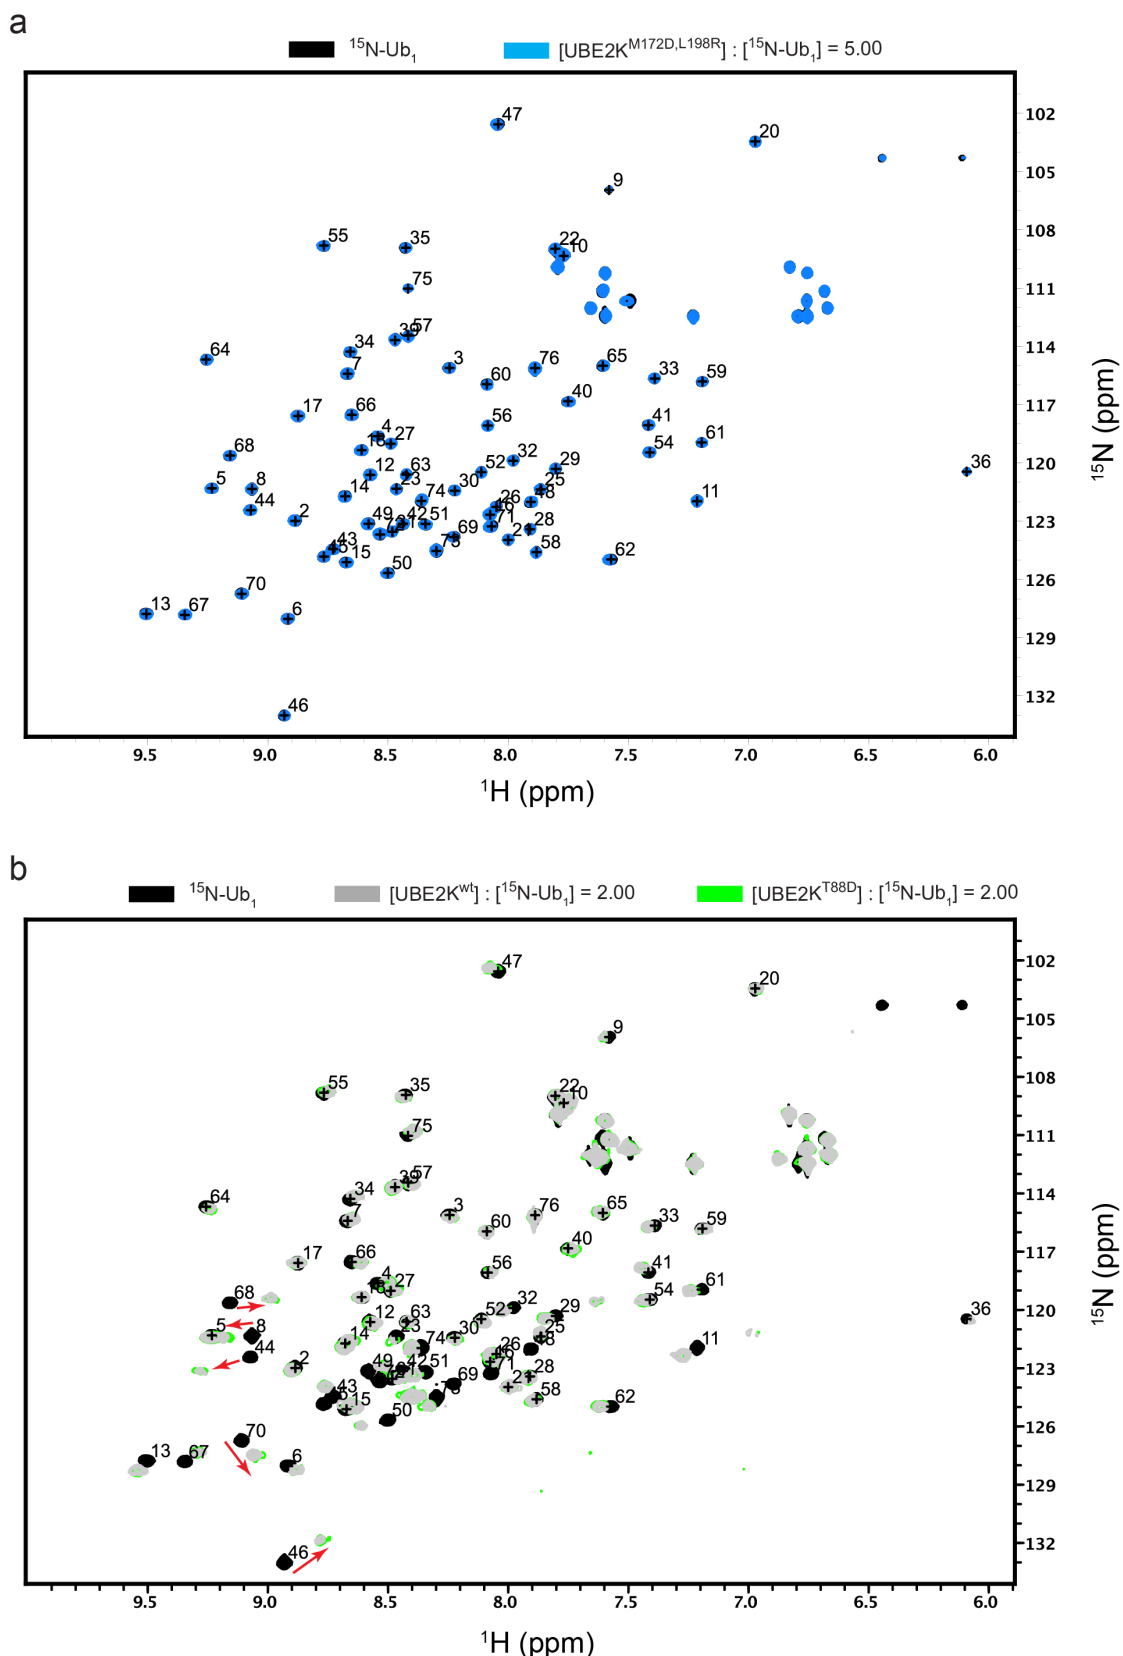

**Supplementary Figure 3. NMR analysis of UBE2K variants and  $^{15}\text{N-Ub}$  interaction.**

(a) Overlay of  $^1\text{H-}^{15}\text{N}$  HSQC spectrum of 200  $\mu\text{M}$   $^{15}\text{N-Ub}$  (black) titrated with a five fold molar excess of  $\text{UBE2K}^{\text{M172D,L198R}}$  (blue), results in essentially no change in the spectrum. (b) Overlay of  $^1\text{H-}^{15}\text{N}$  HSQC spectrum of 200  $\mu\text{M}$   $^{15}\text{N-Ub}$  (black) titrated with a two fold molar excess of  $\text{UBE2K}^{\text{WT}}$  (grey) and  $\text{UBE2K}^{\text{T88D}}$  (green), demonstrates near identical binding to  $^{15}\text{N-Ub}$  (red arrows indicate the trajectory for indicated Ub residues).

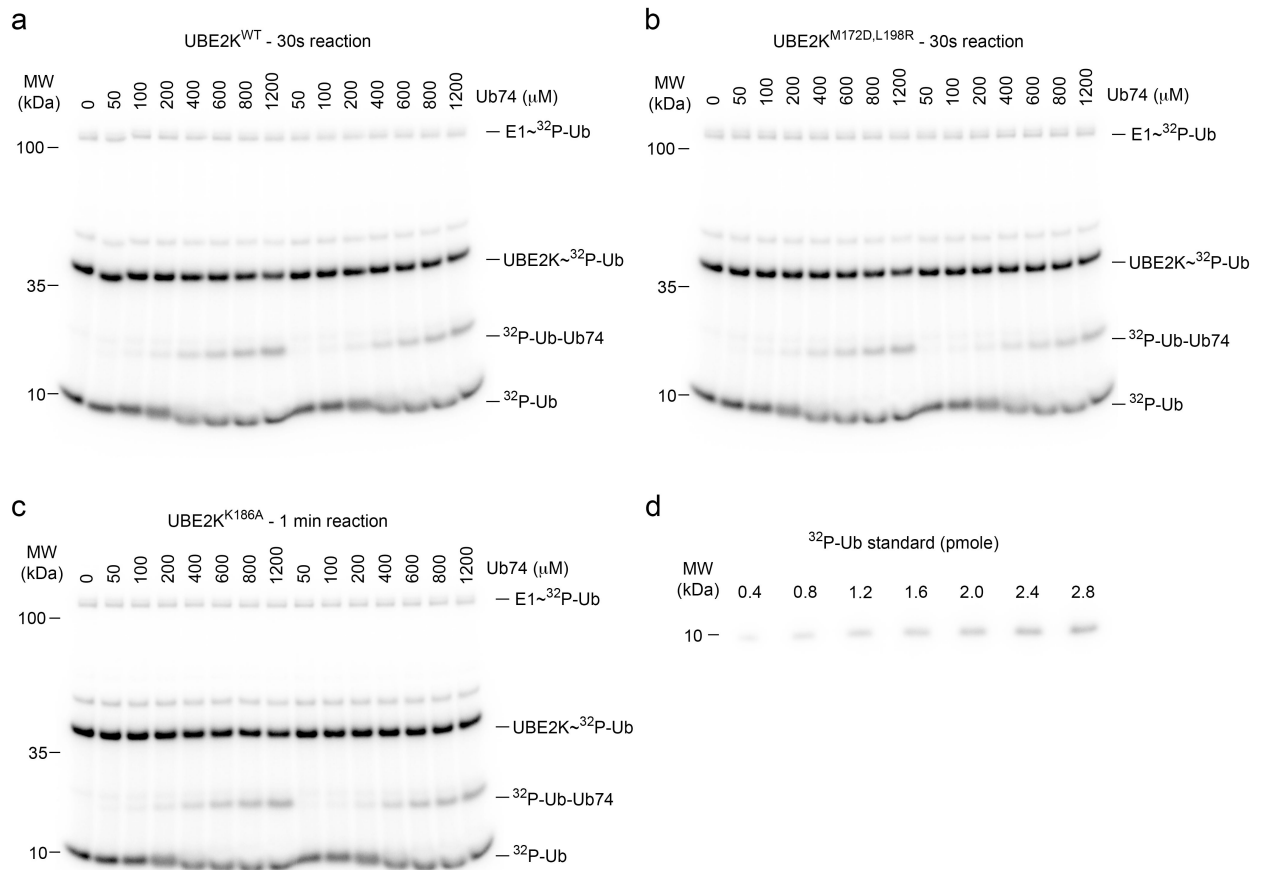

**Supplementary Figure 4. Kinetic analysis of di-Ub formation catalyzed by UBE2K variants, related to Fig. 3f.** Non-reduced autoradiograms showing the formation of <sup>32</sup>P-Ub-Ub74 over a range of Ub74 concentrations catalyzed by UBE2K<sup>WT</sup> (a), UBE2K<sup>M172D,L198R</sup> (b), and UBE2K<sup>L186A</sup> (c). UBE2K variants are pre-charged with <sup>32</sup>P-Ub<sup>K48R</sup>, added to varying Ub74 concentrations and stopped at indicated time as described in the Methods. Under this condition, less than 15% of UBE2K~<sup>32</sup>P-Ub was used at all Ub74 concentrations and hence the reactions represented initial rates. All experiments were performed in duplicate. (d) Autoradiogram showing known amounts of <sup>32</sup>P-Ub used to generate a standard curve for quantification. All gels were exposed together to a phosphorimager screen and scanned with a Typhoon<sup>TM</sup> PLA 7000. Unprocessed scan from Typhoon<sup>TM</sup> PLA 7000 is shown in **Supplementary Figure 7**.

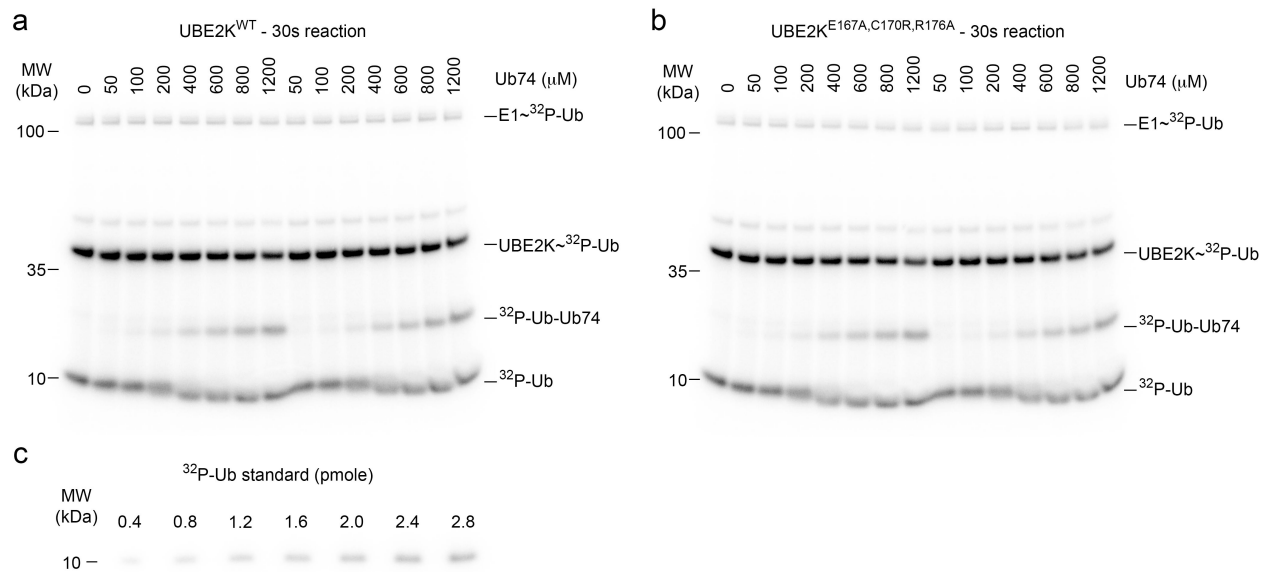

**Supplementary Figure 5. Kinetic analysis of di-Ub formation catalyzed by UBE2K<sup>E167A,C170R,R176A</sup>, related to Extended data Fig. 7h.** Non-reduced autoradiograms showing the formation of <sup>32</sup>P-Ub-Ub74 over a range of Ub74 concentrations catalyzed by UBE2K<sup>WT</sup> (a) and UBE2K<sup>E167A,C170R,R176A</sup> (b). All experiments were performed in duplicate. (c) Autoradiogram showing known amounts of <sup>32</sup>P-Ub used to generate a standard curve for quantification. This is the same <sup>32</sup>P-Ub standard gel used in **Supplementary Fig. 4d** that was exposed together with gels from this set of experiments to a phosphorimager screen and scanned with a Typhoon™ PLA 7000 for quantification. Unprocessed scan from Typhoon™ PLA 7000 is shown in **Supplementary Figure 8**.

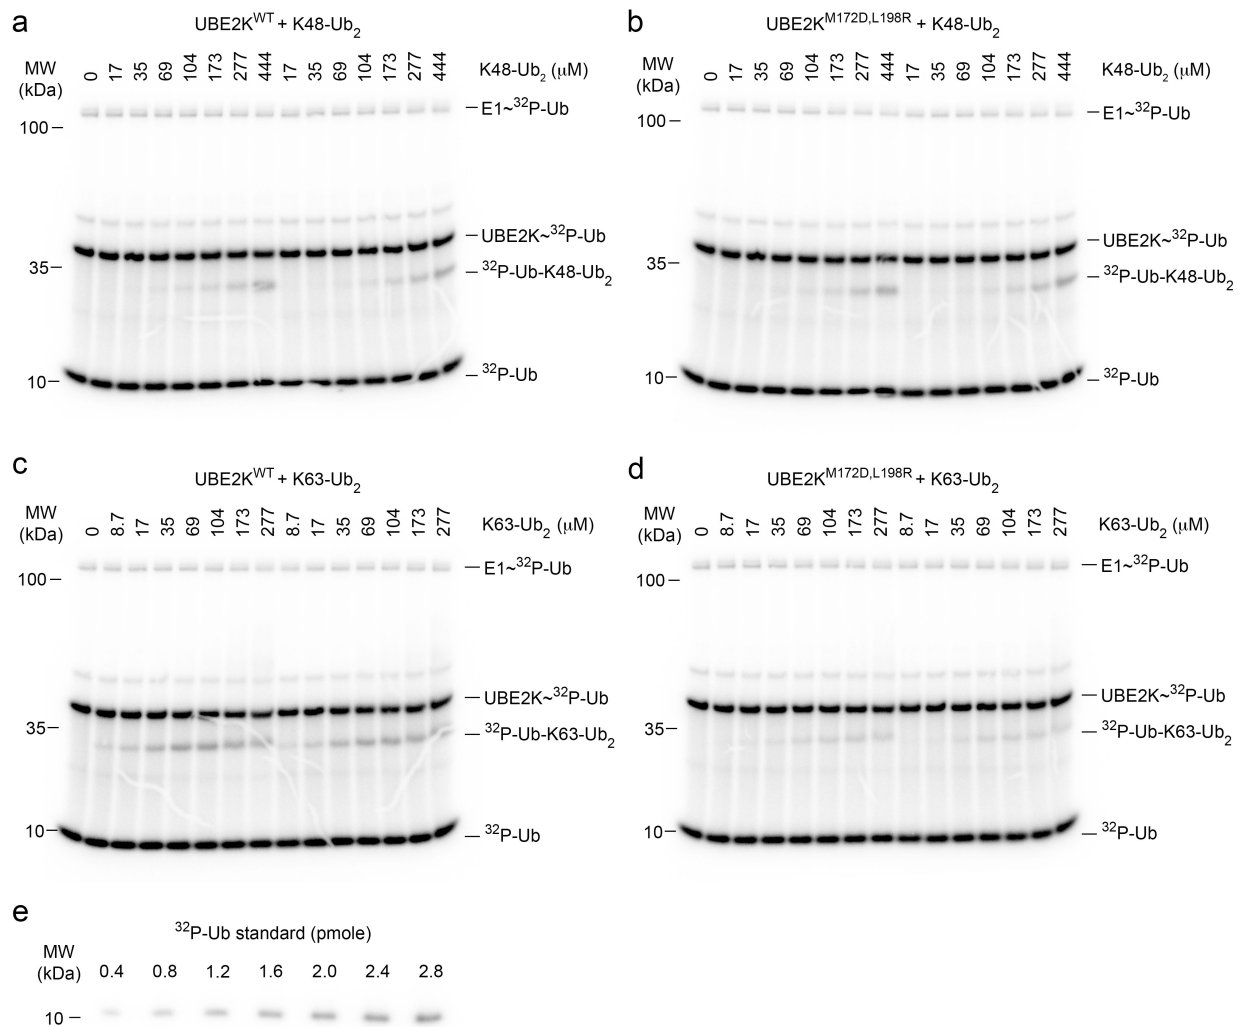

**Supplementary Figure 6. Kinetic analysis of tri-Ub formation with K48-Ub<sub>2</sub> and K63-Ub<sub>2</sub> catalyzed by UBE2K, related to Fig. 6c,e.** Non-reduced autoradiograms showing the formation of <sup>32</sup>P-Ub-K48-Ub<sub>2</sub> over a range of K48-Ub<sub>2</sub> concentrations catalyzed by UBE2K<sup>WT</sup> (a) and UBE2K<sup>M172D,L198R</sup> (b). Non-reduced autoradiograms showing the formation of <sup>32</sup>P-Ub-K63-Ub<sub>2</sub> over a range of K63-Ub<sub>2</sub> concentrations catalyzed by UBE2K<sup>WT</sup> (c) and UBE2K<sup>M172D,L198R</sup> (d). For a–d, all experiments were performed in duplicate. (e) Autoradiogram showing known amounts of <sup>32</sup>P-Ub used to generate a standard curve for quantification. This is the same <sup>32</sup>P-Ub standard gel used in **Supplementary Fig. 4d** that was exposed together with gels from this set of experiments to a phosphorimager screen and scanned with a Typhoon™ PLA 7000 for quantification. Unprocessed scan from Typhoon™ PLA 7000 is shown in **Supplementary Figure 9**.



Sup. Fig. 4a

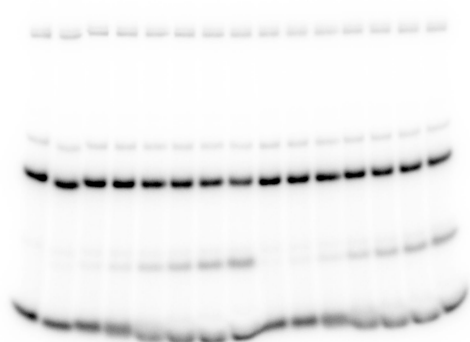

Sup. Fig. 4b

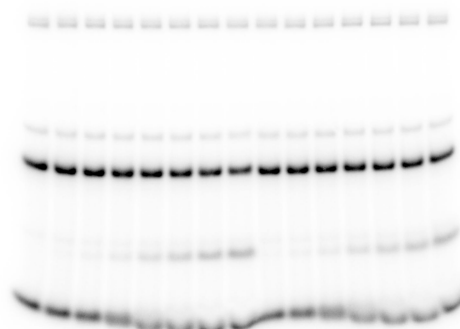

Sup. Fig. 4c

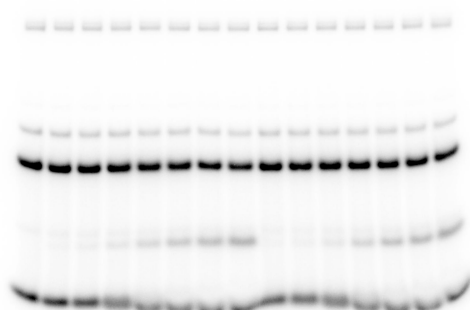

Sup. Fig. 4d

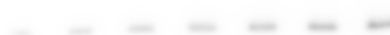

**Supplementary Figure 7.** Unprocessed autoradiograms for **Supplementary Figure 4**. All gels were exposed together to a phosphorimager screen and scanned with a Typhoon™ PLA 7000.

Sup. Fig. 5a

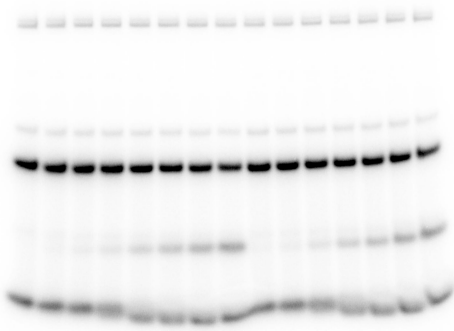

Sup. Fig. 5b

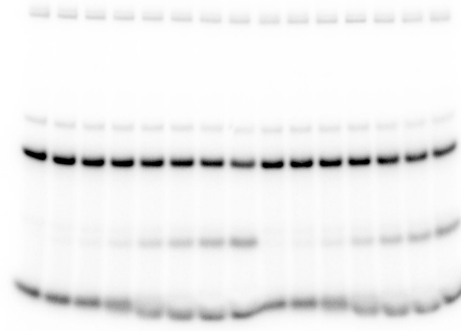

Sup. Fig. 5c

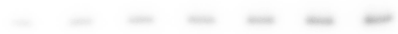

**Supplementary Figure 8.** Unprocessed autoradiograms for **Supplementary Figure 5**. All gels were exposed together to a phosphorimager screen and scanned with a Typhoon™ PLA 7000.

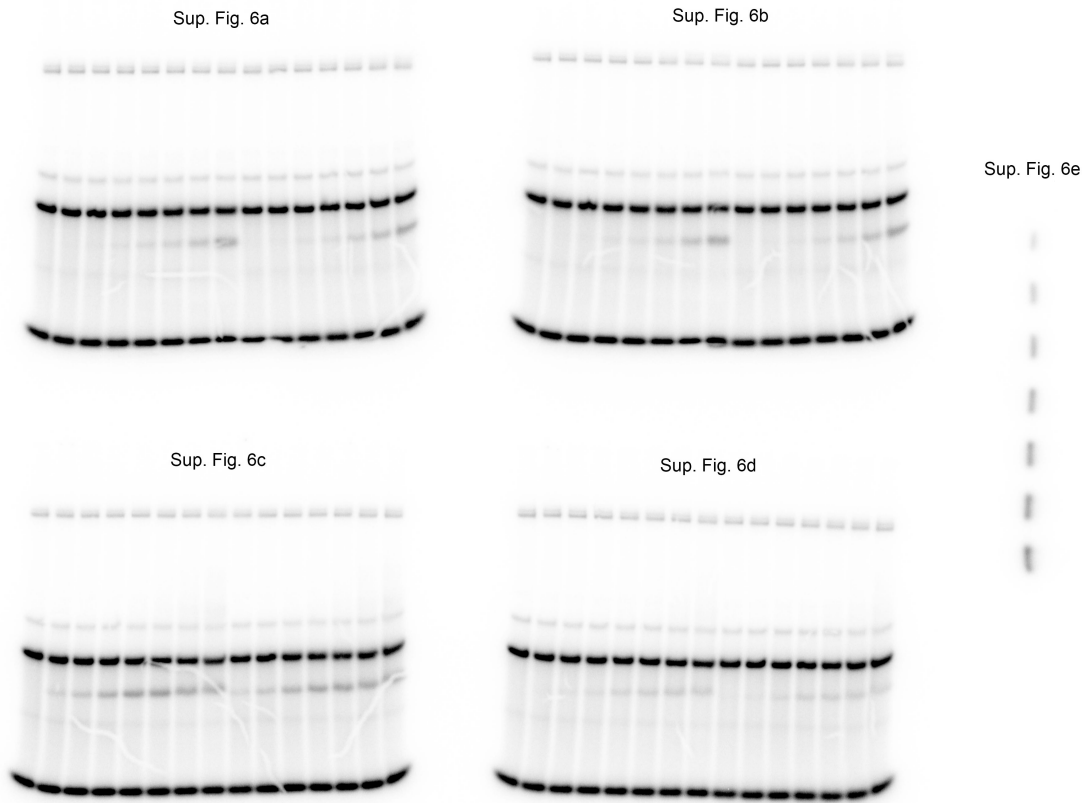

**Supplementary Figure 9.** Unprocessed autoradiograms for **Supplementary Figure 6**. All gels were exposed together to a phosphorimager screen and scanned with a Typhoon™ PLA 7000.

**Supplementary Table 1: Data collection and refinement statistics.**

|                                     | Ub <sup>-C92K</sup> UBE2K <sup>D124C-K48C</sup> Ub <sup>-48</sup> Ub/RNF38 |
|-------------------------------------|----------------------------------------------------------------------------|
| <b>Data collection</b>              |                                                                            |
| Space group                         | P 31 2 1                                                                   |
| Cell dimensions                     |                                                                            |
| <i>a, b, c</i> (Å)                  | 85.83, 85.83, 167.35                                                       |
| $\alpha, \beta, \gamma$ (°)         | 90, 90, 120                                                                |
| Resolution (Å)                      | 74.34 – 2.40 (2.49 -2.40) *                                                |
| $R_{\text{merge}}$                  | 0.059 (0.97)                                                               |
| $I / \sigma I$                      | 19.17 (0.72)                                                               |
| Completeness (%)                    | 99.96 (99.93)                                                              |
| Redundancy                          | 8.6 (8.7)                                                                  |
| <b>Refinement</b>                   |                                                                            |
| Resolution (Å)                      | 74.34 – 2.40                                                               |
| No. reflections / test set          | 28632 / 1412                                                               |
| $R_{\text{work}} / R_{\text{free}}$ | 0.188 / 0.236                                                              |
| No. atoms                           |                                                                            |
| Protein                             | 3671                                                                       |
| Ligand/ion                          | 18                                                                         |
| Water                               | 50                                                                         |
| <i>B</i> -factors                   |                                                                            |
| Protein                             | 94.81                                                                      |
| Ligand/ion                          | 112.88                                                                     |
| Water                               | 75.34                                                                      |
| R.m.s. deviations                   |                                                                            |
| Bond lengths (Å)                    | 0.009                                                                      |
| Bond angles (°)                     | 1.11                                                                       |

\*Values in parentheses are for highest-resolution shell.
